# Supplementary material for: Association of Regional Bone Synthetic Activities of Vertebral Corners and Vertebral Bodies Quantified Using 18F-Fluoride Positron Emission Tomography with Bone Mineral Density on Dual Energy X-ray Absorptiometry in Patients with Ankylosing Spondylitis
Source: MDPI journal article supplement (doi:10.3390/jcm9082656), 2020-08-17
Supplement: s1 [file s1]

Supplementary Table 1. The <sup>18</sup>F-fluoride maximal standardized uptake value of 48 lumbar vertebrae .

|                                                                              | Lumbar vertebrae (n = 48) |
|------------------------------------------------------------------------------|---------------------------|
| <sup>18</sup> F-Fluoride SUVmax of vertebral corner <sup>a</sup> , mean ± SD | 6.75 ± 1.81               |
| <sup>18</sup> F-fluoride SUVmax of vertebral body, mean ± SD                 | 5.46 ± 1.97               |

<sup>a</sup> This indicates the arithmetic mean SUVmax of the upper and lower vertebral corners.

SUVmax: maximal standardized uptake values, BMD: bone mineral density

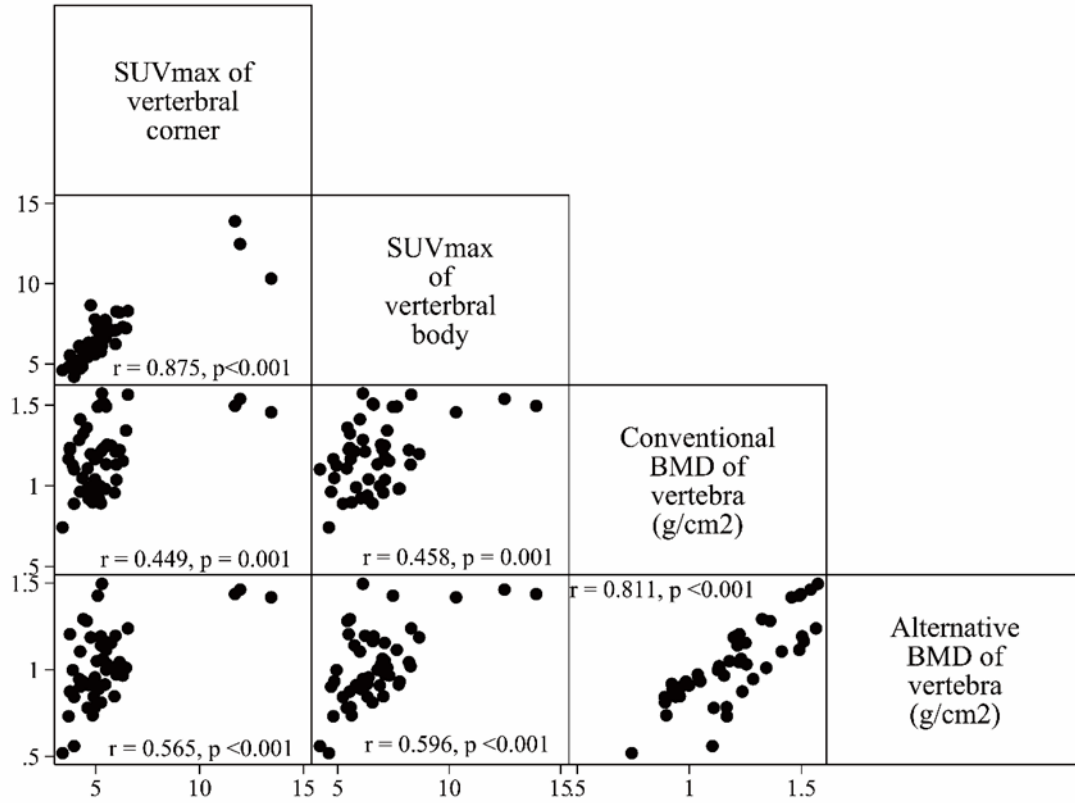

Supplementary Figure 1. Correlation plots between baseline <sup>18</sup>F-fluoride maximal standardized uptake values of the vertebral bodies and corners and conventional and alternative bone mineral density at each vertebra level.

**Supplementary Table 2. Relationship between bone mineral density and 18F-fluoride maximal standardized uptake value of each vertebrae analyzed by univariable generalized estimating equations adjusting for within patients correlations for the total number of lumbar vertebrae**

| Dependent variable                                               | Independent variable                                             | Univariable model           |                |
|------------------------------------------------------------------|------------------------------------------------------------------|-----------------------------|----------------|
|                                                                  |                                                                  | Unstandardized $\beta$ (SE) | <i>p</i> value |
| Conventional BMD of vertebra (g/cm <sup>2</sup> )                | <sup>18</sup> F-fluoride SUVmax of vertebral corner <sup>a</sup> | 0.043 (0.012)               | 0.001          |
| Conventional BMD of vertebra (g/cm <sup>2</sup> )                | <sup>18</sup> F-fluoride SUVmax of vertebral body                | 0.051 (0.014)               | <0.001         |
| Alternative BMD of vertebra (g/cm <sup>2</sup> )                 | <sup>18</sup> F-fluoride SUVmax of vertebral corner <sup>a</sup> | 0.054 (0.013)               | <0.001         |
| Alternative BMD of vertebra (g/cm <sup>2</sup> )                 | <sup>18</sup> F-fluoride SUVmax of vertebral body                | 0.065 (0.015)               | <0.001         |
| <sup>18</sup> F-fluoride SUVmax of vertebral corner <sup>a</sup> | <sup>18</sup> F-fluoride SUVmax of vertebral body                | 0.947 (0.08)                | <0.001         |

<sup>a</sup> This indicates the arithmetic mean SUVmax of the upper and lower vertebral corners.

SUVmax: maximal standardized uptake values, BMD: bone mineral density.

**Supplementary Table 3. Association between 18F-fluoride maximal standardized uptake value and bone mineral density at each lumbar vertebra level assessed by generalized estimating equations adjusting for within patients correlations for the total number of vertebrae**

| Dependent variable                    | Independent variable                                             | Univariable model           |                | Multivariable model <sup>b</sup> |                |
|---------------------------------------|------------------------------------------------------------------|-----------------------------|----------------|----------------------------------|----------------|
|                                       |                                                                  | Unstandardized $\beta$ (SE) | <i>p</i> value | Unstandardized $\beta$ (SE)      | <i>p</i> value |
| Conventional BMD (g/cm <sup>2</sup> ) | <sup>18</sup> F-fluoride SUVmax of vertebral corner <sup>a</sup> | 0.043 (0.012)               | 0.001          | 0.008 (0.021)                    | 0.724          |
|                                       | <sup>18</sup> F-fluoride SUVmax of vertebral body                | 0.051 (0.014)               | <0.001         | 0.046 (0.024)                    | 0.055          |
|                                       | Disease duration (months)                                        | 0.002 (0.001)               | 0.014          | 0.002 (0.001)                    | 0.019          |
|                                       | CRP (mg/dL)                                                      | -0.153 (0.096)              | 0.111          | -0.129 (0.067)                   | 0.06           |
|                                       | Age (years)                                                      | -0.001 (0.006)              | 0.84           |                                  |                |
|                                       | BMI (kg/m <sup>2</sup> )                                         | 0.013 (0.012)               | 0.294          |                                  |                |
|                                       | BASDAI                                                           | -0.017 (0.021)              | 0.426          |                                  |                |
| Alternative BMD (g/cm <sup>2</sup> )  | <sup>18</sup> F-fluoride SUVmax of vertebral corner <sup>a</sup> | 0.054 (0.013)               | <0.001         | 0.023 (0.024)                    | 0.325          |
|                                       | <sup>18</sup> F-fluoride SUVmax of vertebral body                | 0.065 (0.015)               | <0.001         | 0.04 (0.027)                     | 0.137          |
|                                       | BMI (kg/m <sup>2</sup> )                                         | 0.017 (0.012)               | 0.148          | 0.01 (0.009)                     | 0.262          |
|                                       | Disease duration (months)                                        | 0.001 (0.001)               | 0.549          |                                  |                |
|                                       | CRP (mg/dL)                                                      | -0.067 (0.104)              | 0.518          |                                  |                |
|                                       | Age (years)                                                      | -0.006 (0.006)              | 0.305          |                                  |                |
|                                       | BASDAI                                                           | -0.004 (0.022)              | 0.866          |                                  |                |

<sup>a</sup> This indicates the arithmetic mean SUVmax of the upper and lower vertebral corners.

<sup>b</sup> Estimated using multivariable generalized estimating equation models including <sup>18</sup>F-fluoride SUVmax of vertebral body and vertebral corners, disease duration and CRP

for conventional BMD and including  $^{18}\text{F}$ -fluoride SUVmax of vertebral body and vertebral corners and BMI for alternative BMD, respectively.

SE: standard error, BMD: bone mineral density, SUVmax: maximal standardized uptake values, CRP: C-reactive protein, BMI: body mass index, BASDAI: Bath Ankylosing Spondylitis Disease Activity Index.
